# Supplementary material for: Diluted magnetic semiconductors: Mn/Co-doped ZnO nanorods as case study
Source: Royal Society of Chemistry journal article supplement (doi:10.1039/b808361d), 2008-01-01
Supplement: b808361d.pdf [file b808361d.pdf]

Supplementary Material (ESI) for Journal of Materials Chemistry

## **Diluted magnetic semiconductors: Mn/Co-doped ZnO nanorods as case study**

**Igor Djerdj,<sup>a</sup> Georg Garnweitner,<sup>b</sup> Denis Arçon,<sup>\*c,d</sup> Matej Pregelj,<sup>c</sup> Zvonko Jagličić,<sup>e,f</sup> and Markus Niederberger<sup>g</sup>**

<sup>a</sup>Dr. I. Djerdj, Prof. Dr. M. Niederberger

Department of Materials, ETH Zürich, Wolfgang-Pauli-Strasse 10, 8093 Zürich, Switzerland.

Fax:+41 (0) 44 632 1101;

Tel:+41 (0) 44 633 6707;

E-mail: igor.djerdj@mat.ethz.ch

<sup>b</sup>Prof. Dr. G. Garnweitner

Institute for Particle Technology, TU Braunschweig,

Volkmaroder Str. 5, 38104 Braunschweig, Germany.

<sup>c</sup>Prof. Dr. D. Arçon, M. Pregelj

Institute Jožef Stefan, Jamova 39, 1000 Ljubljana, Slovenia.

Fax + 386 (0) 1426 3269;

Tel + 386 (0) 1477 3492;

E-mail: denis.arcon@ijs.si

<sup>d</sup>Prof. Dr. D. Arçon

Faculty of Mathematics and Physics, University of Ljubljana,

Jadranska 19, 1000 Ljubljana, Slovenia.

<sup>e</sup>Prof. Dr. Z. Jagličić

Institute of Mathematics, Physics and Mechanics,

Jadranska 19, 1000 Ljubljana, Slovenia.

†Prof. Dr. Z. Jagličić

Faculty of Civil and Geodetic Engineering, University of Ljubljana,

Jamova 2, 1000 Ljubljana, Slovenia.

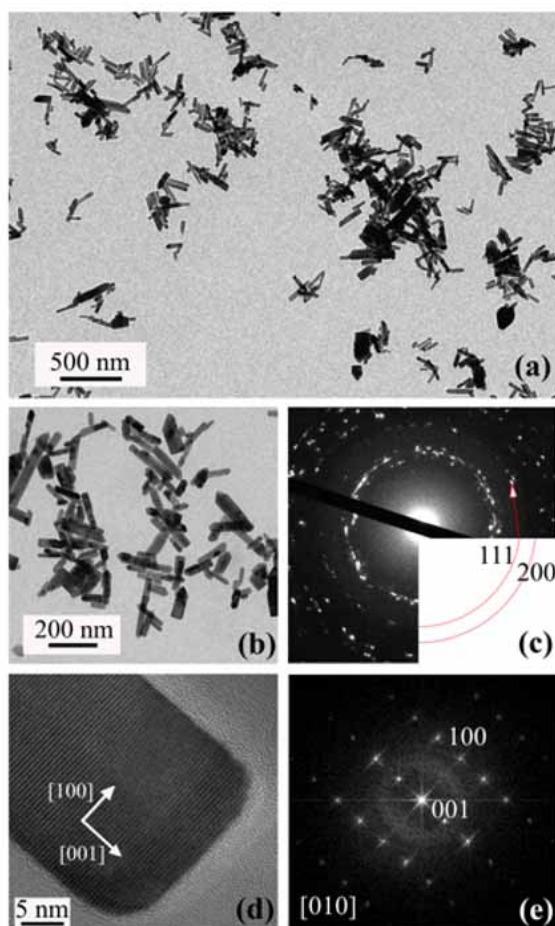

**Fig. S1** (a) Overview TEM image of 3% Co:ZnO nanorods; (b) TEM image of 3% Co:ZnO nanorods at higher magnification; (c) Comparison of the SAED pattern of 3% Co:ZnO with the simulated pattern of *fcc* Co; (d) HRTEM image of a tip of 3% Co:ZnO nanorod with [001] crystal growth direction; (e) Corresponding power spectrum of (d) revealing [010] zone-axis of ZnO.
